# Supplementary material for: Rats Selected for Different Nervous Excitability: Long-Term Emotional–Painful Stress Affects the Dynamics of DNA Damage in Cells of Several Brain Areas
Source: MDPI journal article supplement (doi:10.3390/ijms25020994), 2024-01-13
Supplement: s1 [file s1]

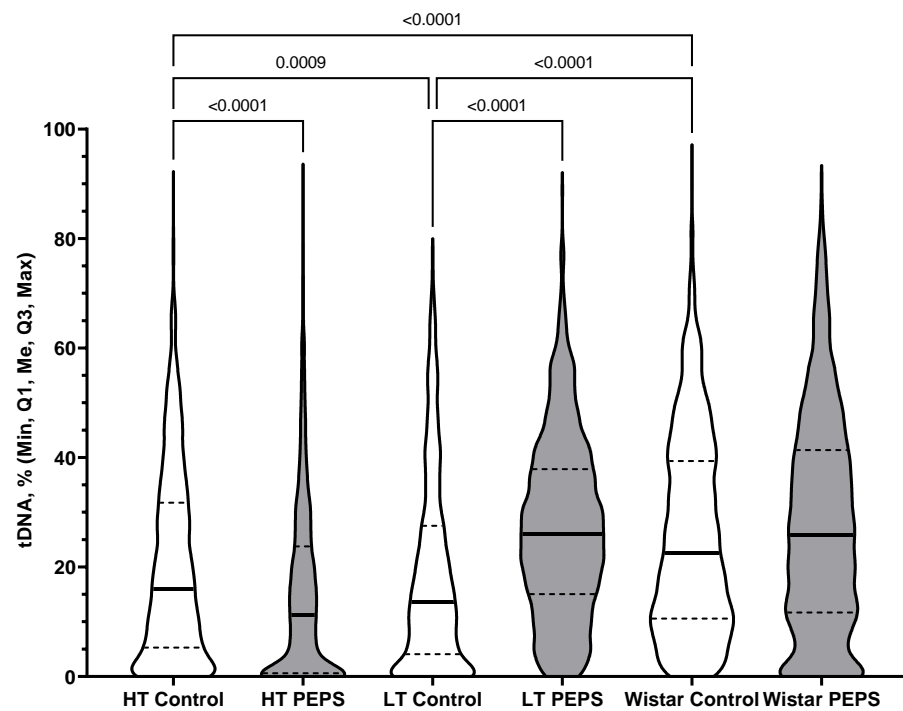

**Supplementary Figure S1.** tDNA content in PFC cells of unstressed (Control) and stressed (2 hours after PEPS) rats of three strains (HT, LT, and Wistar). Significant differences in pairwise comparison (determined in Kruskal-Wallis test) between stressed and the corresponding control groups as well as differences between unstressed animals of different strains are shown as lines with *p*-level.

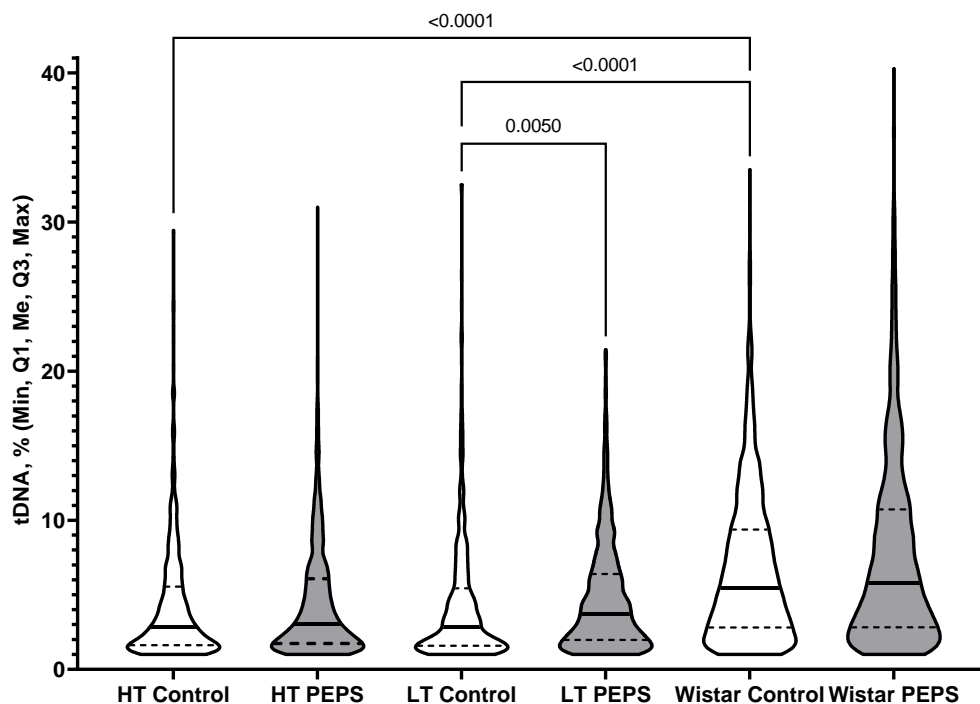

**Supplementary Figure S2.** tDNA content in PFC cells of unstressed (Control) and stressed (2 weeks after PEPS) rats of three strains (HT, LT, and Wistar). Significant differences in pairwise comparison (determined in Kruskal-Wallis test) between stressed and the corresponding control groups as well as differences between unstressed animals of different strains are shown as lines with *p*-level.

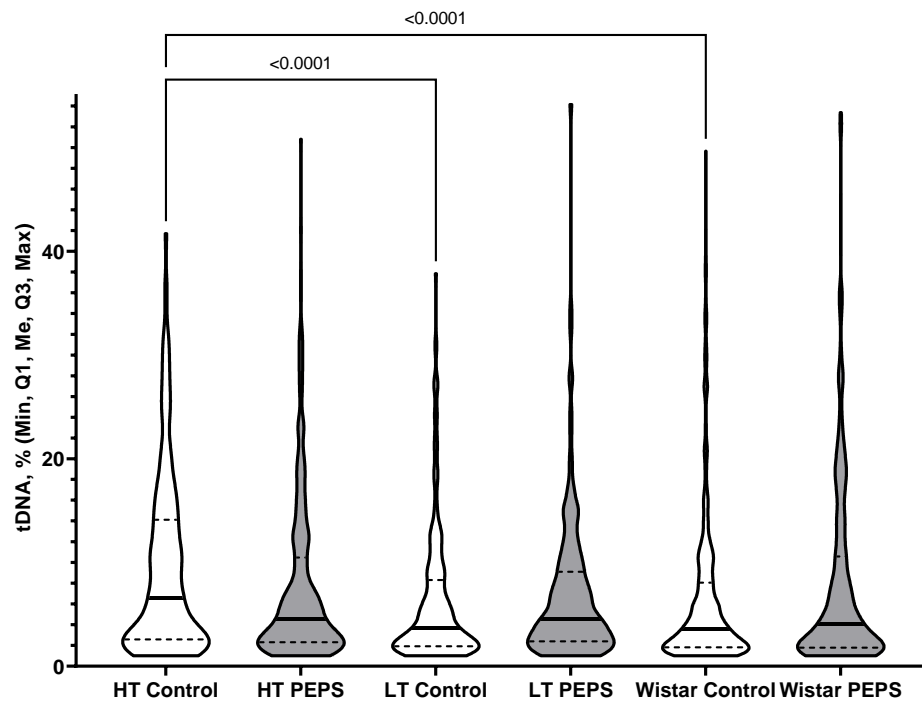

**Supplementary Figure S3.** tDNA content in PFC cells of unstressed (Control) and stressed (2 months after PEPS) rats of three strains (HT, LT, and Wistar). Significant differences in pairwise comparison (determined in Kruskal-Wallis test) between stressed and the corresponding control groups as well as differences between unstressed animals of different strains are shown as lines with  $p$ -level.

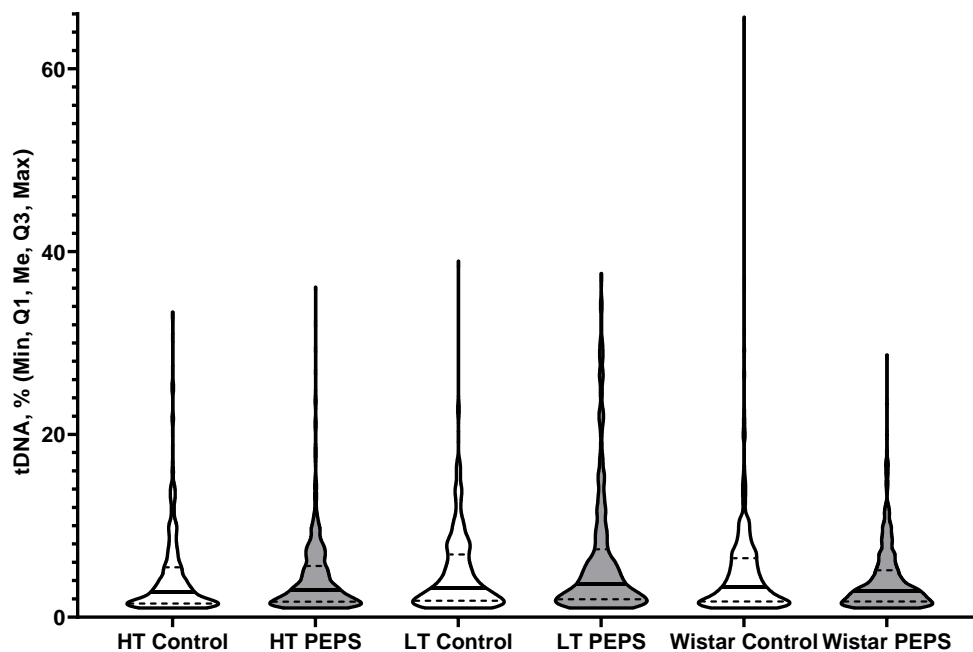

**Supplementary Figure S4.** tDNA content in hippocampal cells of unstressed (Control) and stressed (2 weeks after PEPS) rats of three strains (HT, LT, and Wistar). Significant differences in pairwise comparison (determined in Kruskal-Wallis test) between stressed and the corresponding control groups as well as differences between unstressed animals of different strains are shown as lines with  $p$ -level.

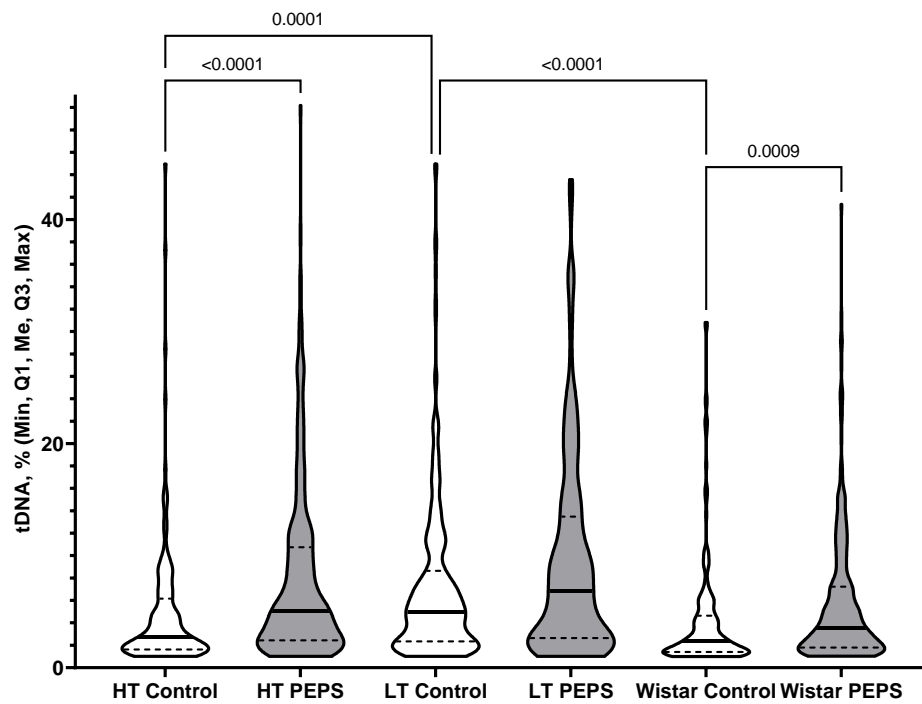

**Supplementary Figure S5.** tDNA content in hippocampal cells of unstressed (Control) and stressed (2 months after PEPS) rats of three strains (HT, LT, and Wistar). Significant differences in pairwise comparison (determined in Kruskal-Wallis test) between stressed and the corresponding control groups as well as differences between unstressed animals of different strains are shown as lines with *p*-level.

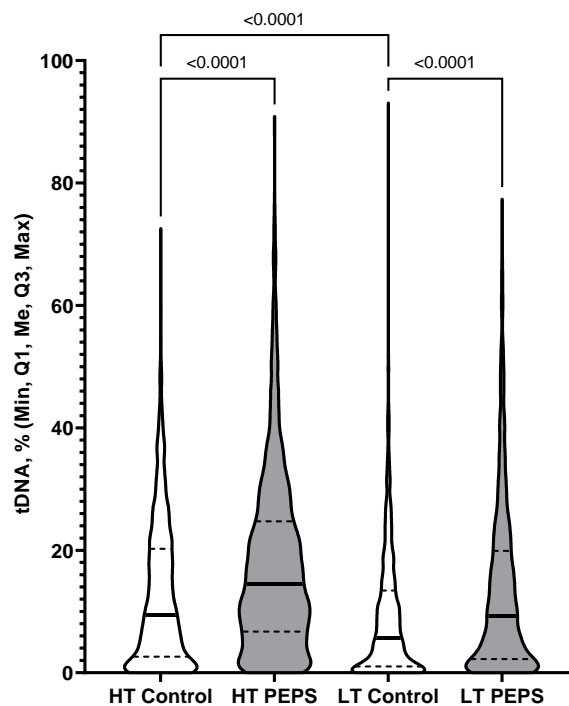

**Supplementary Figure S6.** tDNA content in amygdala cells of unstressed (Control) and stressed (1 hour after PEPS) rats of three strains (HT and LT). Significant differences in pairwise comparison (determined in Kruskal-Wallis test) between stressed and the corresponding control groups as well as differences between unstressed animals of different strains are shown as lines with *p*-level.

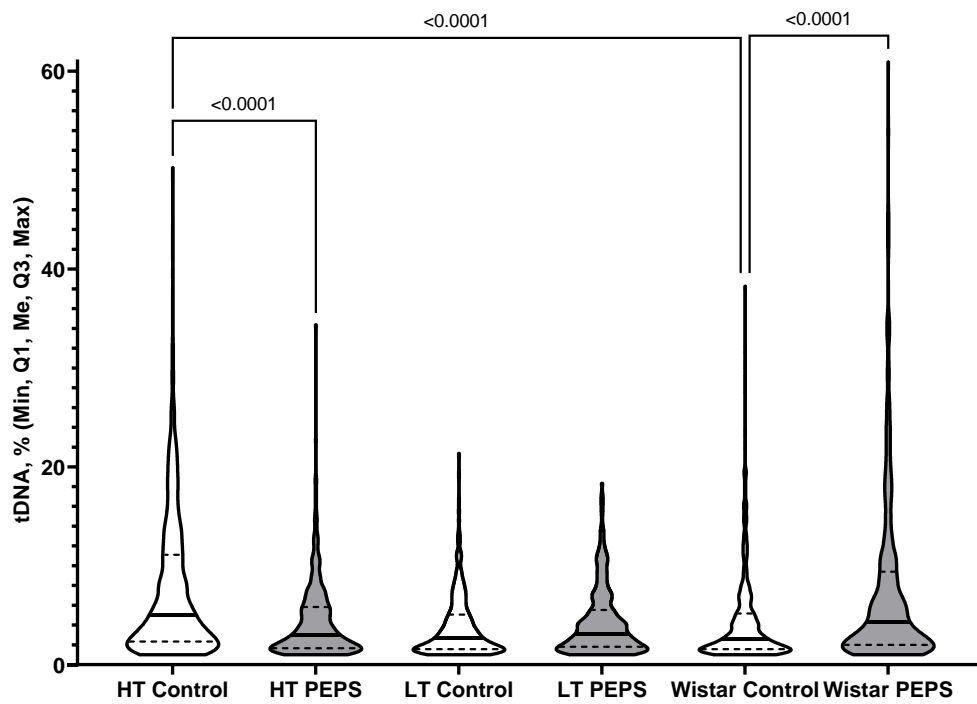

**Supplementary Figure S7.** tDNA content in amygdala cells of unstressed (Control) and stressed (2 weeks after PEPS) rats of three strains (HT, LT, and Wistar). Significant differences in pairwise comparison (determined in Kruskal-Wallis test) between stressed and the corresponding control groups as well as differences between unstressed animals of different strains are shown as lines with *p*-level.

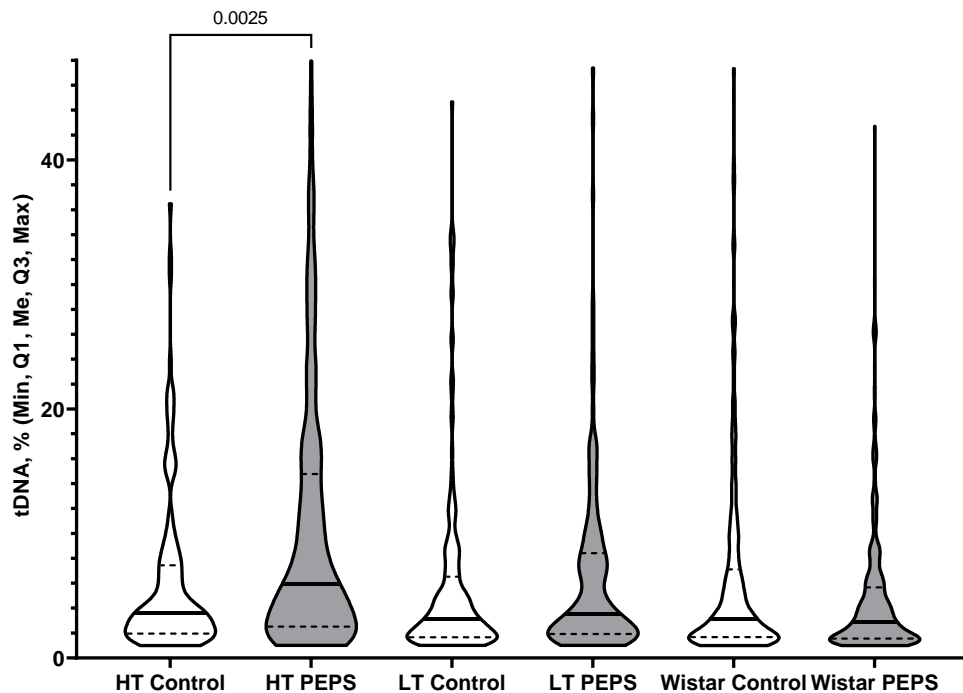

**Supplementary Figure S8.** tDNA content in amygdala cells of unstressed (Control) and stressed (2 months after PEPS) rats of three strains (HT, LT, and Wistar). Significant differences in pairwise comparison (determined in Kruskal-Wallis test) between stressed and the corresponding control groups as well as differences between unstressed animals of different strains are shown as lines with *p*-level.
